# Supplementary material for: Green Tea, Coffee, and Caffeine Consumption Are Inversely Associated with Self-Report Lifetime Depression in the Korean Population
Source: PubMed Central journal article supplement (PMC6163318; doi:10.3390/nu10091201), 2018-09-01
Supplement: nutrients-10-01201-s001.pdf [file nutrients-10-01201-s001.pdf]

**Supplemental Table S1.** Characteristics of participants who were included in the analysis, and participants who were excluded from the analysis.

|                                      | <b>Included<br/>(<i>n</i> = 9576)</b> | <b>Excluded<br/>(<i>n</i> = 10023)</b> | <b><i>p</i> Value</b> |
|--------------------------------------|---------------------------------------|----------------------------------------|-----------------------|
| Age (year)                           | 49.7 ± 0.3                            | 51.4 ± 0.3                             | <0.0001               |
| No. of participants (%)              |                                       |                                        | <0.0001               |
| Men                                  | 3852 (40.2)                           | 4609 (46.0)                            |                       |
| Women                                | 5724 (59.8)                           | 5414 (54.0)                            |                       |
| Income level (%)                     |                                       |                                        | 0.01                  |
| Low                                  | 2305 (24.1)                           | 2440 (24.3)                            |                       |
| Medium                               | 4896 (51.1)                           | 4846 (48.3)                            |                       |
| High                                 | 2375 (24.8)                           | 2737 (27.3)                            |                       |
| Educational level (%)                |                                       |                                        | 0.10                  |
| Elementary school (≤6 y)             | 2392 (25.0)                           | 2214 (26.7)                            |                       |
| Middle/ high school (7–12 y)         | 4230 (44.2)                           | 3657 (44.1)                            |                       |
| College or higher (>12 y)            | 2954 (30.8)                           | 2413 (29.1)                            |                       |
| Smoking status (%)                   |                                       |                                        | <0.0001               |
| Never                                | 5810 (60.7)                           | 4756 (47.5)                            |                       |
| Former                               | 1901 (19.9)                           | 1731 (17.3)                            |                       |
| Current                              | 1865 (19.5)                           | 3536 (35.3)                            |                       |
| Alcohol consumption (%)              |                                       |                                        | <0.0001               |
| Never                                | 2584 (27.0)                           | 2514 (30.6)                            |                       |
| < 2 times/week                       | 5031 (52.5)                           | 3965 (48.2)                            |                       |
| ≥ 2 times/week                       | 1961 (20.5)                           | 1742 (21.2)                            |                       |
| Physical activity                    |                                       |                                        |                       |
| Regular                              | 4518 (47.2)                           | 3722 (37.6)                            | <0.0001               |
| Body mass index (kg/m <sup>2</sup> ) | 23.6 ± 0.0                            | 23.7 ± 0.0                             | 0.12                  |
| Energy intake (kcal/day)             | 2003.5 ± 10.8                         | 1910.8 ± 12.7                          | <0.0001               |
| Beverage intake                      |                                       |                                        |                       |
| Green tea (cups/week)                | 1.79 ± 0.05                           | 1.97 ± 0.11                            | 0.78                  |
| Coffee (cups/day)                    | 1.33 ± 0.01                           | 1.25 ± 0.02                            | <0.0001               |
| Food intake (times/day)              |                                       |                                        |                       |
| Vegetable                            | 4.23 ± 0.03                           | 4.25 ± 0.05                            | 0.58                  |
| Fruit                                | 1.05 ± 0.01                           | 1.05 ± 0.02                            | 0.60                  |
| Red meat                             | 0.46 ± 0.01                           | 0.44 ± 0.01                            | <0.0001               |
| Fish                                 | 0.92 ± 0.01                           | 0.93 ± 0.02                            | 0.73                  |

<sup>a</sup> Values are means ± SE or numbers (percentages); All *p* values are significant at *p* < 0.05; Data were missing for the following variables: education, *n* = 1739; alcohol consumption, *n* = 1802.
